# Supplementary material for: Characterization of Domiphen Bromide as a New Fast-Acting Antiplasmodial Agent Inhibiting the Apicoplastidic Methyl Erythritol Phosphate Pathway
Source: MDPI journal article supplement (doi:10.3390/pharmaceutics14071320), 2022-06-22
Supplement: s1 [file s1]

# Characterization of Domiphen Bromide as a New Fast-acting Antiplasmodial Agent Inhibiting the Apicoplastidic Methyl Erythritol Phosphate Pathway

**Arnau Biosca** <sup>1,2,3,#</sup>, **Miriam Ramírez** <sup>1,#</sup>, **Alex Gomez-Gomez** <sup>4,5</sup>, **Aritz Lafuente** <sup>1,2,3</sup>, **Valentín Iglesias** <sup>1,2,3,6</sup>, **Oscar J. Pozo** <sup>4,5</sup>, **Santiago Imperial** <sup>3,7</sup>, **Xavier Fernàndez-Busquets** <sup>1,2,3,\*</sup>

<sup>1</sup> Barcelona Institute for Global Health (ISGlobal, Hospital Clínic-Universitat de Barcelona), Rosselló 149-153, 08036 Barcelona, Spain; [naubiosca@gmail.com](mailto:naubiosca@gmail.com) (A.B.), [miriam.ramirez@isglobal.org](mailto:miriam.ramirez@isglobal.org) (M.R.), [aritz.lafuente@gmail.com](mailto:aritz.lafuente@gmail.com) (A.L.), [valentin.iglesias.mas@gmail.com](mailto:valentin.iglesias.mas@gmail.com) (V.I.)

<sup>2</sup> Nanomalaria Group, Institute for Bioengineering of Catalonia (IBEC), The Barcelona Institute of Science and Technology, Baldiri Reixac 10-12, 08028 Barcelona, Spain

<sup>3</sup> Nanoscience and Nanotechnology Institute (IN2UB), University of Barcelona, Martí i Franquès 1, 08028 Barcelona, Spain; [simperial@ub.edu](mailto:simperial@ub.edu) (S.I.)

<sup>4</sup> Integrative Pharmacology and Systems Neuroscience Research Group, Neurosciences Research Program, IMIM-Institut Hospital del Mar d'Investigacions Mèdiques, Doctor Aiguader 88, 08003 Barcelona, Spain; [agomez@imim.es](mailto:agomez@imim.es) (A.G.-G.), [opozo@imim.es](mailto:opozo@imim.es) (O.J.P.)

<sup>5</sup> Department of Experimental and Health Sciences, Universitat Pompeu Fabra, Doctor Aiguader 88, 08003 Barcelona, Spain

<sup>6</sup> Institut de Biotecnologia i Biomedicina and Departament de Bioquímica i Biologia Molecular, Universitat Autònoma de Barcelona, 08193 Bellaterra, Spain

<sup>7</sup> Department of Biochemistry and Molecular Biomedicine, University of Barcelona, Avda. Diagonal 643, 08028 Barcelona, Spain

# Both authors contributed equally

\* Correspondence: [xfernandez\\_busquets@ub.edu](mailto:xfernandez_busquets@ub.edu) (X.F.-B.); Tel.: +34-93-227-5400 (extension 4581)

## Supplementary Material

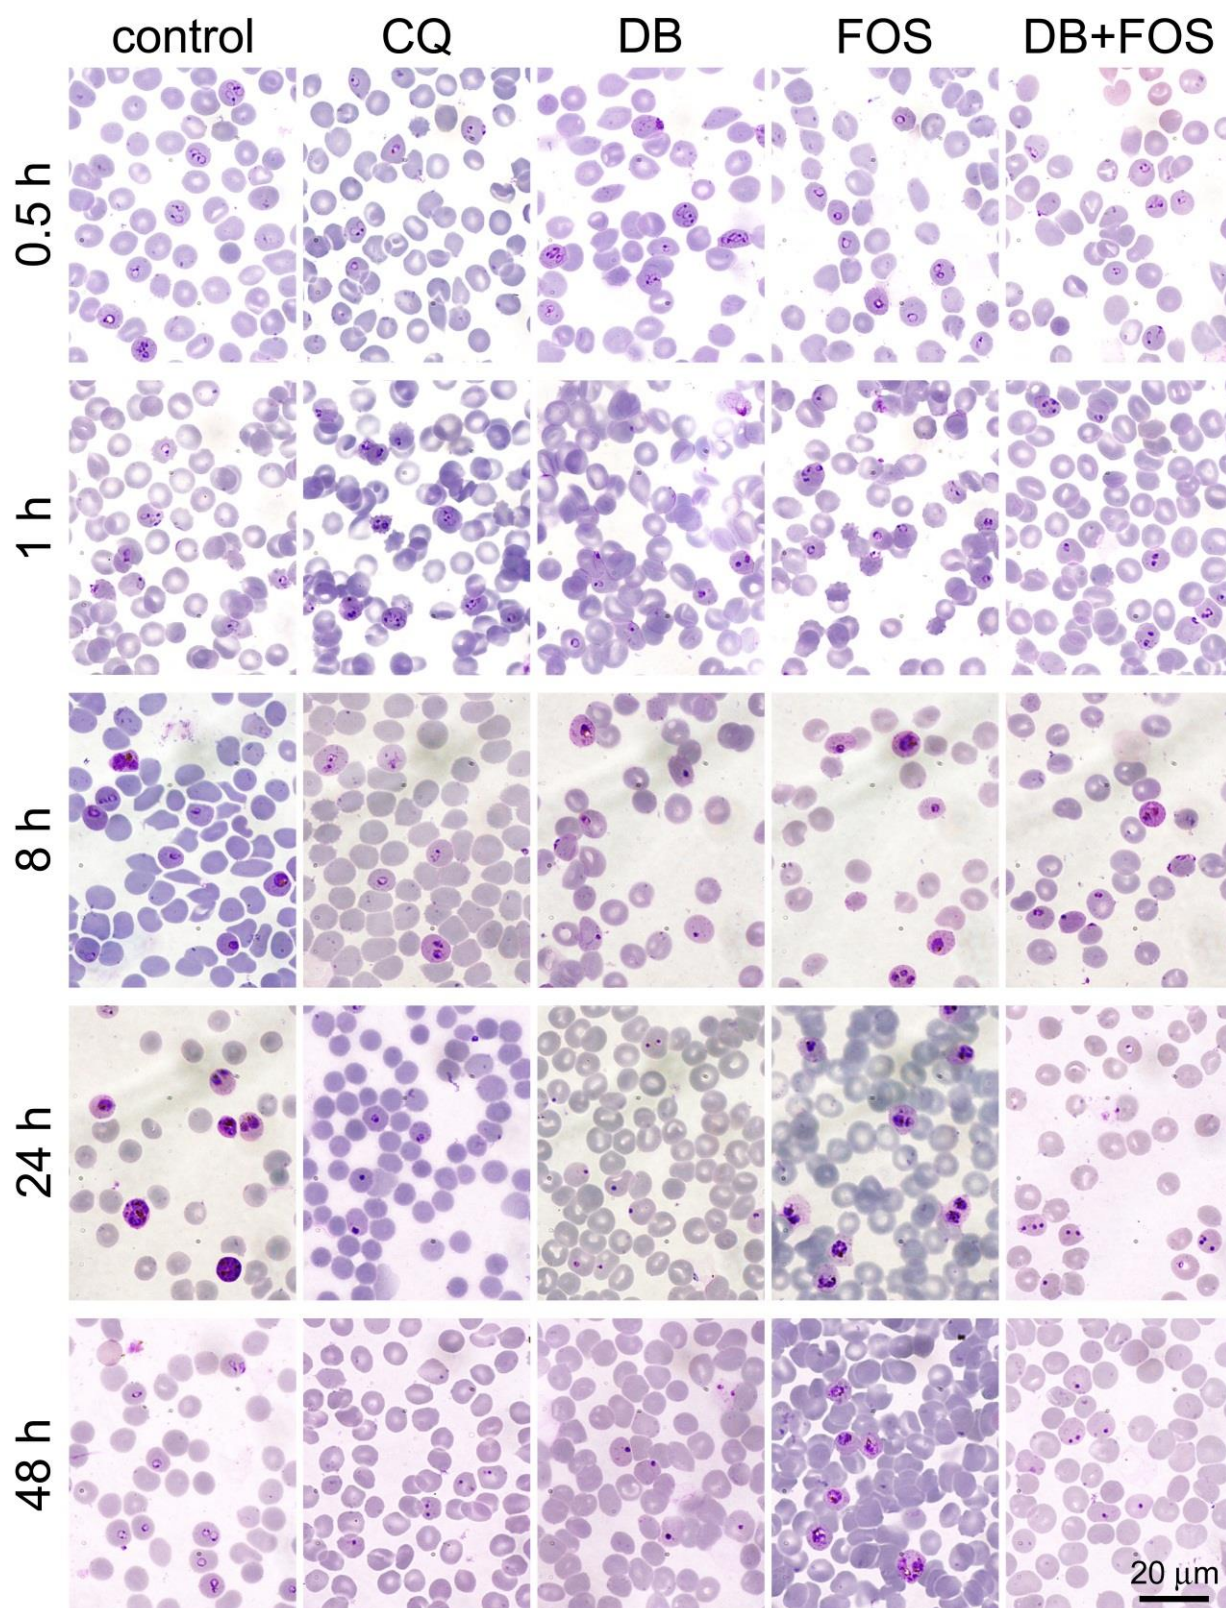

**Figure S1.** Effect of DB and fosmidomycin (FOS) on *in vitro* *P. falciparum* cultures. Representative images of Giemsa-stained *P. falciparum* cultures at different times after the addition of antimalarial drugs. CQ: chloroquine.
